# Supplementary material for: Matching action to need: an analysis of Global Burden of Disease 2017 and population health data to focus adolescent health policy and actions in Myanmar
Source: PubMed Central journal article supplement (PMC7833024; doi:10.1080/16549716.2020.1844976), 2021-01-15

Table A1. Health outcome groupings and indicator definitions for health risks and determinants.

| Indicator                      | Age     | Definition                                                                                                                                                                                                                                                                                                 | Data source                              | Year      |
|--------------------------------|---------|------------------------------------------------------------------------------------------------------------------------------------------------------------------------------------------------------------------------------------------------------------------------------------------------------------|------------------------------------------|-----------|
| <i>Health outcomes</i>         |         |                                                                                                                                                                                                                                                                                                            |                                          |           |
| <u>Major grouping</u>          | 10 – 24 | <i>Including but not limited to the following causes:</i>                                                                                                                                                                                                                                                  |                                          |           |
| HIV                            |         | HIV/AIDS and HIV/AIDS resulting in other diseases.                                                                                                                                                                                                                                                         | Global Burden of Disease (GBD) Study [1] | 2017      |
| Sexual and reproductive health |         | STIs and maternal disorders.                                                                                                                                                                                                                                                                               |                                          |           |
| Communicable diseases          |         | Encephalitis, meningitis, tuberculosis, typhoid, neglected tropical diseases, vaccine preventable diseases, diarrheal diseases, hepatitis, malaria, neonatal sepsis, respiratory infections, communicable skin diseases.                                                                                   |                                          |           |
| Nutrition                      |         | Iron deficiency anaemia and nutritional deficiency.                                                                                                                                                                                                                                                        |                                          |           |
| Assault                        |         | physical violence by firearm, by sharp object, sexual violence, conflict and terrorism, collective violence.                                                                                                                                                                                               |                                          |           |
| Unintentional injury           |         | Animal injury, drowning, falls, fire, forces of nature, foreign body injury, mechanical forces injury, poisoning, transport injury.                                                                                                                                                                        |                                          |           |
| Alcohol and other Drugs        |         | Substance use disorders of alcohol, opioid, cocaine, amphetamine, and cannabis.                                                                                                                                                                                                                            |                                          |           |
| Mental disorder                |         | Intellectual disability, anxiety, behavioural disorder, bipolar, depression, eating disorder, psychotic disorders, self-harm                                                                                                                                                                               |                                          |           |
| Non-communicable Diseases      |         | Arthritis, asthma, low back or neck pain, cardiovascular diseases, congenital, dental, diabetes, endocrine, epilepsy, gastrointestinal, gynaecological, haemoglobinopathy, migraine, neoplasm, neurological, other musculoskeletal, renal, respiratory, sensory disorders, non-communicable skin diseases. |                                          |           |
| <i>Health risks</i>            |         |                                                                                                                                                                                                                                                                                                            |                                          |           |
| Overweight and obesity         | 10 – 19 | BMI measured >1 standard deviation above the median estimate (%)                                                                                                                                                                                                                                           | WHO Global Health Observatory [2]        | 2019      |
| Thinness                       | 10 – 19 | BMI <2 standard deviation below median estimate (%)                                                                                                                                                                                                                                                        | WHO Global Health Observatory [2]        | 2019      |
| Anaemia                        | 10 – 14 | Males and females: haemoglobin <115 g/L (%)                                                                                                                                                                                                                                                                | GBD study [1]                            | 2017      |
|                                | 15 – 24 | males: haemoglobin <130 g/L; non-pregnant females: haemoglobin <120 g/L; pregnant females: haemoglobin <110 g/L (%)                                                                                                                                                                                        |                                          |           |
| Comprehensive knowledge of HIV | 15 – 24 | Percentage of 15-24-year-olds with comprehensive knowledge of HIV (who correctly identify the two ways of preventing the sexual transmission of HIV, who know that a healthy-looking person can be HIV-positive and who reject the two most common misconceptions about HIV transmission)                  | Myanmar DHS [3]                          | 2015-2016 |

|                                           |         |                                                                                                                                                        |                                       |           |
|-------------------------------------------|---------|--------------------------------------------------------------------------------------------------------------------------------------------------------|---------------------------------------|-----------|
| Tobacco smoking                           | 10 – 24 | Current tobacco smoking (%), by 5-year group                                                                                                           | GBD study [1]                         | 2017      |
| Binge drinking                            | 15 – 24 | Males: >60 grams of alcohol on single occasion in the last 12 months (%)<br>Females: >48 grams of alcohol on single occasion in the last 12 months (%) | GBD study [1]                         | 2016      |
| Illicit drug use                          | 10 – 24 | All-cause DALY rate attributed to illicit drug use                                                                                                     | GBD study [1]                         | 2017      |
| <i>Determinants</i>                       |         |                                                                                                                                                        |                                       |           |
| Literacy                                  | 15 – 24 | Percentage of literate persons (%)                                                                                                                     | UNESCO Institute for Statistics [4]   | 2019      |
| Mean years of education                   | 10 – 24 | Mean number of years of education attainment, age specific.                                                                                            | GBD study [1]                         | 2017      |
| Educational Attainment                    | 20 – 24 | Percent distribution of 20-24-year-olds by highest level of schooling attended or completed.                                                           | Myanmar DHS [3]                       | 2015-2016 |
| Not in employment, education, or training | 15 – 24 | Share of youth not in employment, education, or training (%)                                                                                           | International Labour Organization [5] | 2019      |
| Child Marriage                            | 20 – 24 | Adolescents married before age 15; and before age 18 (%)                                                                                               | Myanmar DHS [3]                       | 2015-2016 |
| Adolescent fertility rate                 | 10 – 24 | Live births per 1,000 females aged 10-24-years, in 5-year age bands                                                                                    | GBD study [1]                         | 2017      |
| Adolescent fertility rate                 | 10 – 24 | Live births per 1,000 females aged 10-24-years, in 5-year age bands                                                                                    | Myanmar DHS [3]                       | 2015-2016 |
| Met need for contraception                | 15 – 24 | Proportion of females aged 15-24-years who have their need for family planning satisfied with modern methods (%)                                       | GBD study [1]                         | 2016      |

#### References

- [1] GBD Study 2017. Global Burden of Disease Study 2017 (GBD 2017) Results. Seattle, United States: Institute for Health Metrics and Evaluation (IHME), 2018. Available at: <http://ghdx.healthdata.org/gbd-results-tool> [Accessed 21st November 2018].
- [2] World Health Organization. Global Health Observatory (GHO) data [online database]. Available at: <https://apps.who.int/gho/data/node.home> [Accessed 04 March 2019].
- [3] Ministry of Health and Sports - MoHS/Myanmar and ICF. Myanmar Demographic and Health Survey 2015-16. Nay Pyi Taw, Myanmar: MoHS and ICF, 2017. Available at: <http://dhsprogram.com/pubs/pdf/FR324/FR324.pdf> [Accessed 10 February 2020].
- [4] UNESCO Institute of Statistics. UNESCO Institute of Statistics: Myanmar statistics. Available at: <http://uis.unesco.org/en/country/mm> [Accessed 1 March 2020].
- [5] International Labour Organization. ILOSTAT database [database]. 2020. Available at: <https://ilostat.ilo.org/data/> [Accessed 05 April 2019].

Table A2. Full list of GBD 2017 disaggregated causes and their corresponding major group of relevance to adolescent health.

| GBD 2017 Cause ID | GBD 2017 Cause name                                                           | Level | Major Group                  |
|-------------------|-------------------------------------------------------------------------------|-------|------------------------------|
| 948               | HIV/AIDS - Drug-susceptible Tuberculosis                                      | 4     | HIV                          |
| 949               | HIV/AIDS - Multidrug-resistant Tuberculosis without extensive drug resistance | 4     | HIV                          |
| 950               | HIV/AIDS - Extensively drug-resistant Tuberculosis                            | 4     | HIV                          |
| 300               | HIV/AIDS resulting in other diseases                                          | 4     | HIV                          |
| 394               | Syphilis                                                                      | 4     | Sexual & reproductive health |
| 395               | Chlamydial infection                                                          | 4     | Sexual & reproductive health |
| 396               | Gonococcal infection                                                          | 4     | Sexual & reproductive health |
| 397               | Trichomoniasis                                                                | 4     | Sexual & reproductive health |
| 398               | Genital herpes                                                                | 4     | Sexual & reproductive health |
| 399               | Other sexually transmitted infections                                         | 4     | Sexual & reproductive health |
| 367               | Maternal hemorrhage                                                           | 4     | Sexual & reproductive health |
| 368               | Maternal sepsis and other maternal infections                                 | 4     | Sexual & reproductive health |
| 369               | Maternal hypertensive disorders                                               | 4     | Sexual & reproductive health |
| 370               | Maternal obstructed labor and uterine rupture                                 | 4     | Sexual & reproductive health |
| 995               | Maternal abortion and miscarriage                                             | 4     | Sexual & reproductive health |
| 374               | Ectopic pregnancy                                                             | 4     | Sexual & reproductive health |
| 375               | Indirect maternal deaths                                                      | 4     | Sexual & reproductive health |
| 376               | Late maternal deaths                                                          | 4     | Sexual & reproductive health |
| 741               | Maternal deaths aggravated by HIV/AIDS                                        | 4     | Sexual & reproductive health |
| 379               | Other maternal disorders                                                      | 4     | Sexual & reproductive health |
| 954               | Latent tuberculosis infection                                                 | 4     | Communicable diseases        |
| 934               | Drug-susceptible tuberculosis                                                 | 4     | Communicable diseases        |
| 946               | Multidrug-resistant tuberculosis without extensive drug resistance            | 4     | Communicable diseases        |
| 947               | Extensively drug-resistant tuberculosis                                       | 4     | Communicable diseases        |
| 322               | Lower respiratory infections                                                  | 3     | Communicable diseases        |
| 328               | Upper respiratory infections                                                  | 3     | Communicable diseases        |
| 329               | Otitis media                                                                  | 3     | Communicable diseases        |
| 302               | Diarrheal diseases                                                            | 3     | Communicable diseases        |
| 319               | Typhoid fever                                                                 | 4     | Communicable diseases        |
| 320               | Paratyphoid fever                                                             | 4     | Communicable diseases        |

|     |                                           |   |                       |
|-----|-------------------------------------------|---|-----------------------|
| 959 | Invasive Non-typhoidal Salmonella (iNTS)  | 3 | Communicable diseases |
| 321 | Other intestinal infectious diseases      | 3 | Communicable diseases |
| 345 | Malaria                                   | 3 | Communicable diseases |
| 346 | Chagas disease                            | 3 | Communicable diseases |
| 348 | Visceral leishmaniasis                    | 4 | Communicable diseases |
| 349 | Cutaneous and mucocutaneous leishmaniasis | 4 | Communicable diseases |
| 350 | African trypanosomiasis                   | 3 | Communicable diseases |
| 351 | Schistosomiasis                           | 3 | Communicable diseases |
| 352 | Cysticercosis                             | 3 | Communicable diseases |
| 353 | Cystic echinococcosis                     | 3 | Communicable diseases |
| 354 | Lymphatic filariasis                      | 3 | Communicable diseases |
| 355 | Onchocerciasis                            | 3 | Communicable diseases |
| 356 | Trachoma                                  | 3 | Communicable diseases |
| 357 | Dengue                                    | 3 | Communicable diseases |
| 358 | Yellow fever                              | 3 | Communicable diseases |
| 359 | Rabies                                    | 3 | Communicable diseases |
| 361 | Ascariasis                                | 4 | Communicable diseases |
| 362 | Trichuriasis                              | 4 | Communicable diseases |
| 363 | Hookworm disease                          | 4 | Communicable diseases |
| 364 | Food-borne trematodiasis                  | 3 | Communicable diseases |
| 405 | Leprosy                                   | 3 | Communicable diseases |
| 843 | Ebola                                     | 3 | Communicable diseases |
| 935 | Zika virus                                | 3 | Communicable diseases |
| 936 | Guinea worm disease                       | 3 | Communicable diseases |
| 365 | Other neglected tropical diseases         | 3 | Communicable diseases |
| 333 | Pneumococcal meningitis                   | 4 | Communicable diseases |
| 334 | H influenzae type B meningitis            | 4 | Communicable diseases |
| 335 | Meningococcal meningitis                  | 4 | Communicable diseases |
| 336 | Other meningitis                          | 4 | Communicable diseases |
| 337 | Encephalitis                              | 3 | Communicable diseases |
| 338 | Diphtheria                                | 3 | Communicable diseases |
| 339 | Whooping cough                            | 3 | Communicable diseases |

|     |                                                          |   |                           |
|-----|----------------------------------------------------------|---|---------------------------|
| 340 | Tetanus                                                  | 3 | Communicable diseases     |
| 341 | Measles                                                  | 3 | Communicable diseases     |
| 342 | Varicella and herpes zoster                              | 3 | Communicable diseases     |
| 401 | Acute hepatitis A                                        | 4 | Communicable diseases     |
| 402 | Acute hepatitis B                                        | 4 | Communicable diseases     |
| 403 | Acute hepatitis C                                        | 4 | Communicable diseases     |
| 404 | Acute hepatitis E                                        | 4 | Communicable diseases     |
| 408 | Other unspecified infectious diseases                    | 3 | Communicable diseases     |
| 383 | Neonatal sepsis and other neonatal infections            | 4 | Communicable diseases     |
| 656 | Cellulitis                                               | 4 | Communicable diseases     |
| 657 | Pyoderma                                                 | 4 | Communicable diseases     |
| 658 | Scabies                                                  | 3 | Communicable diseases     |
| 659 | Fungal skin diseases                                     | 3 | Communicable diseases     |
| 660 | Viral skin diseases                                      | 3 | Communicable diseases     |
| 387 | Protein-energy malnutrition                              | 3 | Nutrition                 |
| 388 | Iodine deficiency                                        | 3 | Nutrition                 |
| 389 | Vitamin A deficiency                                     | 3 | Nutrition                 |
| 390 | Dietary iron deficiency                                  | 3 | Nutrition                 |
| 391 | Other nutritional deficiencies                           | 3 | Nutrition                 |
| 381 | Neonatal preterm birth                                   | 4 | Non-communicable diseases |
| 382 | Neonatal encephalopathy due to birth asphyxia and trauma | 4 | Non-communicable diseases |
| 384 | Hemolytic disease and other neonatal jaundice            | 4 | Non-communicable diseases |
| 385 | Other neonatal disorders                                 | 4 | Non-communicable diseases |
| 444 | Lip and oral cavity cancer                               | 3 | Non-communicable diseases |
| 447 | Nasopharynx cancer                                       | 3 | Non-communicable diseases |
| 450 | Other pharynx cancer                                     | 3 | Non-communicable diseases |
| 411 | Esophageal cancer                                        | 3 | Non-communicable diseases |
| 414 | Stomach cancer                                           | 3 | Non-communicable diseases |
| 441 | Colon and rectum cancer                                  | 3 | Non-communicable diseases |
| 418 | Liver cancer due to hepatitis B                          | 4 | Non-communicable diseases |
| 419 | Liver cancer due to hepatitis C                          | 4 | Non-communicable diseases |
| 420 | Liver cancer due to alcohol use                          | 4 | Non-communicable diseases |

|     |                                                                        |   |                           |
|-----|------------------------------------------------------------------------|---|---------------------------|
| 996 | Liver cancer due to NASH                                               | 4 | Non-communicable diseases |
| 421 | Liver cancer due to other causes                                       | 4 | Non-communicable diseases |
| 453 | Gallbladder and biliary tract cancer                                   | 3 | Non-communicable diseases |
| 456 | Pancreatic cancer                                                      | 3 | Non-communicable diseases |
| 423 | Larynx cancer                                                          | 3 | Non-communicable diseases |
| 426 | Tracheal, bronchus, and lung cancer                                    | 3 | Non-communicable diseases |
| 459 | Malignant skin melanoma                                                | 3 | Non-communicable diseases |
| 849 | Non-melanoma skin cancer (squamous-cell carcinoma)                     | 4 | Non-communicable diseases |
| 850 | Non-melanoma skin cancer (basal-cell carcinoma)                        | 4 | Non-communicable diseases |
| 429 | Breast cancer                                                          | 3 | Non-communicable diseases |
| 432 | Cervical cancer                                                        | 3 | Non-communicable diseases |
| 435 | Uterine cancer                                                         | 3 | Non-communicable diseases |
| 465 | Ovarian cancer                                                         | 3 | Non-communicable diseases |
| 438 | Prostate cancer                                                        | 3 | Non-communicable diseases |
| 468 | Testicular cancer                                                      | 3 | Non-communicable diseases |
| 471 | Kidney cancer                                                          | 3 | Non-communicable diseases |
| 474 | Bladder cancer                                                         | 3 | Non-communicable diseases |
| 477 | Brain and nervous system cancer                                        | 3 | Non-communicable diseases |
| 480 | Thyroid cancer                                                         | 3 | Non-communicable diseases |
| 483 | Mesothelioma                                                           | 3 | Non-communicable diseases |
| 484 | Hodgkin lymphoma                                                       | 3 | Non-communicable diseases |
| 485 | Non-Hodgkin lymphoma                                                   | 3 | Non-communicable diseases |
| 486 | Multiple myeloma                                                       | 3 | Non-communicable diseases |
| 845 | Acute lymphoid leukemia                                                | 4 | Non-communicable diseases |
| 846 | Chronic lymphoid leukemia                                              | 4 | Non-communicable diseases |
| 847 | Acute myeloid leukemia                                                 | 4 | Non-communicable diseases |
| 848 | Chronic myeloid leukemia                                               | 4 | Non-communicable diseases |
| 943 | Other leukemia                                                         | 4 | Non-communicable diseases |
| 489 | Other malignant neoplasms                                              | 3 | Non-communicable diseases |
| 964 | Myelodysplastic, myeloproliferative, and other hematopoietic neoplasms | 4 | Non-communicable diseases |
| 965 | Benign and in situ intestinal neoplasms                                | 4 | Non-communicable diseases |
| 966 | Benign and in situ cervical and uterine neoplasms                      | 4 | Non-communicable diseases |

|     |                                                                |   |                           |
|-----|----------------------------------------------------------------|---|---------------------------|
| 967 | Other benign and in situ neoplasms                             | 4 | Non-communicable diseases |
| 492 | Rheumatic heart disease                                        | 3 | Non-communicable diseases |
| 493 | Ischemic heart disease                                         | 3 | Non-communicable diseases |
| 495 | Ischemic stroke                                                | 4 | Non-communicable diseases |
| 496 | Intracerebral hemorrhage                                       | 4 | Non-communicable diseases |
| 497 | Subarachnoid hemorrhage                                        | 4 | Non-communicable diseases |
| 498 | Hypertensive heart disease                                     | 3 | Non-communicable diseases |
| 968 | Non-rheumatic calcific aortic valve disease                    | 4 | Non-communicable diseases |
| 969 | Non-rheumatic degenerative mitral valve disease                | 4 | Non-communicable diseases |
| 970 | Other non-rheumatic valve diseases                             | 4 | Non-communicable diseases |
| 942 | Myocarditis                                                    | 4 | Non-communicable diseases |
| 938 | Alcoholic cardiomyopathy                                       | 4 | Non-communicable diseases |
| 944 | Other cardiomyopathy                                           | 4 | Non-communicable diseases |
| 500 | Atrial fibrillation and flutter                                | 3 | Non-communicable diseases |
| 501 | Aortic aneurysm                                                | 3 | Non-communicable diseases |
| 502 | Peripheral artery disease                                      | 3 | Non-communicable diseases |
| 503 | Endocarditis                                                   | 3 | Non-communicable diseases |
| 507 | Other cardiovascular and circulatory diseases                  | 3 | Non-communicable diseases |
| 509 | Chronic obstructive pulmonary disease                          | 3 | Non-communicable diseases |
| 511 | Silicosis                                                      | 4 | Non-communicable diseases |
| 512 | Asbestosis                                                     | 4 | Non-communicable diseases |
| 513 | Coal workers pneumoconiosis                                    | 4 | Non-communicable diseases |
| 514 | Other pneumoconiosis                                           | 4 | Non-communicable diseases |
| 515 | Asthma                                                         | 3 | Non-communicable diseases |
| 516 | Interstitial lung disease and pulmonary sarcoidosis            | 3 | Non-communicable diseases |
| 520 | Other chronic respiratory diseases                             | 3 | Non-communicable diseases |
| 522 | Cirrhosis and other chronic liver diseases due to hepatitis B  | 4 | Non-communicable diseases |
| 523 | Cirrhosis and other chronic liver diseases due to hepatitis C  | 4 | Non-communicable diseases |
| 524 | Cirrhosis and other chronic liver diseases due to alcohol use  | 4 | Non-communicable diseases |
| 971 | Cirrhosis due to NASH                                          | 4 | Non-communicable diseases |
| 525 | Cirrhosis and other chronic liver diseases due to other causes | 4 | Non-communicable diseases |
| 527 | Peptic ulcer disease                                           | 4 | Non-communicable diseases |

|     |                                                            |   |                           |
|-----|------------------------------------------------------------|---|---------------------------|
| 528 | Gastritis and duodenitis                                   | 4 | Non-communicable diseases |
| 536 | Gastroesophageal reflux disease                            | 4 | Non-communicable diseases |
| 529 | Appendicitis                                               | 3 | Non-communicable diseases |
| 530 | Paralytic ileus and intestinal obstruction                 | 3 | Non-communicable diseases |
| 531 | Inguinal, femoral, and abdominal hernia                    | 3 | Non-communicable diseases |
| 532 | Inflammatory bowel disease                                 | 3 | Non-communicable diseases |
| 533 | Vascular intestinal disorders                              | 3 | Non-communicable diseases |
| 534 | Gallbladder and biliary diseases                           | 3 | Non-communicable diseases |
| 535 | Pancreatitis                                               | 3 | Non-communicable diseases |
| 541 | Other digestive diseases                                   | 3 | Non-communicable diseases |
| 543 | Alzheimer's disease and other dementias                    | 3 | Non-communicable diseases |
| 544 | Parkinson's disease                                        | 3 | Non-communicable diseases |
| 545 | Epilepsy                                                   | 3 | Non-communicable diseases |
| 546 | Multiple sclerosis                                         | 3 | Non-communicable diseases |
| 554 | Motor neuron disease                                       | 3 | Non-communicable diseases |
| 547 | Migraine                                                   | 4 | Non-communicable diseases |
| 548 | Tension-type headache                                      | 4 | Non-communicable diseases |
| 557 | Other neurological disorders                               | 3 | Non-communicable diseases |
| 975 | Diabetes mellitus type 1                                   | 4 | Non-communicable diseases |
| 976 | Diabetes mellitus type 2                                   | 4 | Non-communicable diseases |
| 997 | Chronic kidney disease due to diabetes mellitus type 1     | 4 | Non-communicable diseases |
| 998 | Chronic kidney disease due to diabetes mellitus type 2     | 4 | Non-communicable diseases |
| 591 | Chronic kidney disease due to hypertension                 | 4 | Non-communicable diseases |
| 592 | Chronic kidney disease due to glomerulonephritis           | 4 | Non-communicable diseases |
| 593 | Chronic kidney disease due to other and unspecified causes | 4 | Non-communicable diseases |
| 588 | Acute glomerulonephritis                                   | 3 | Non-communicable diseases |
| 977 | Atopic dermatitis                                          | 4 | Non-communicable diseases |
| 978 | Contact dermatitis                                         | 4 | Non-communicable diseases |
| 979 | Seborrhoeic dermatitis                                     | 4 | Non-communicable diseases |
| 655 | Psoriasis                                                  | 3 | Non-communicable diseases |
| 661 | Acne vulgaris                                              | 3 | Non-communicable diseases |
| 662 | Alopecia areata                                            | 3 | Non-communicable diseases |



|      |                                               |   |                           |
|------|-----------------------------------------------|---|---------------------------|
| 663  | Pruritus                                      | 3 | Non-communicable diseases |
| 664  | Urticaria                                     | 3 | Non-communicable diseases |
| 665  | Decubitus ulcer                               | 3 | Non-communicable diseases |
| 668  | Other skin and subcutaneous diseases          | 3 | Non-communicable diseases |
| 670  | Glaucoma                                      | 4 | Non-communicable diseases |
| 671  | Cataract                                      | 4 | Non-communicable diseases |
| 672  | Age-related macular degeneration              | 4 | Non-communicable diseases |
| 999  | Refraction disorders                          | 4 | Non-communicable diseases |
| 1000 | Near vision loss                              | 4 | Non-communicable diseases |
| 675  | Other vision loss                             | 4 | Non-communicable diseases |
| 674  | Age-related and other hearing loss            | 3 | Non-communicable diseases |
| 679  | Other sense organ diseases                    | 3 | Non-communicable diseases |
| 627  | Rheumatoid arthritis                          | 3 | Non-communicable diseases |
| 628  | Osteoarthritis                                | 3 | Non-communicable diseases |
| 630  | Low back pain                                 | 3 | Non-communicable diseases |
| 631  | Neck pain                                     | 3 | Non-communicable diseases |
| 632  | Gout                                          | 3 | Non-communicable diseases |
| 639  | Other musculoskeletal disorders               | 3 | Non-communicable diseases |
| 642  | Neural tube defects                           | 4 | Non-communicable diseases |
| 643  | Congenital heart anomalies                    | 4 | Non-communicable diseases |
| 644  | Orofacial clefts                              | 4 | Non-communicable diseases |
| 645  | Down syndrome                                 | 4 | Non-communicable diseases |
| 646  | Turner syndrome                               | 4 | Non-communicable diseases |
| 647  | Klinefelter syndrome                          | 4 | Non-communicable diseases |
| 648  | Other chromosomal abnormalities               | 4 | Non-communicable diseases |
| 649  | Congenital musculoskeletal and limb anomalies | 4 | Non-communicable diseases |
| 650  | Urogenital congenital anomalies               | 4 | Non-communicable diseases |
| 651  | Digestive congenital anomalies                | 4 | Non-communicable diseases |
| 652  | Other congenital birth defects                | 4 | Non-communicable diseases |
| 595  | Urinary tract infections                      | 4 | Non-communicable diseases |
| 596  | Urolithiasis                                  | 4 | Non-communicable diseases |
| 597  | Benign prostatic hyperplasia                  | 4 | Non-communicable diseases |

|     |                                                   |   |                           |
|-----|---------------------------------------------------|---|---------------------------|
| 598 | Male infertility                                  | 4 | Non-communicable diseases |
| 602 | Other urinary diseases                            | 4 | Non-communicable diseases |
| 604 | Uterine fibroids                                  | 4 | Non-communicable diseases |
| 605 | Polycystic ovarian syndrome                       | 4 | Non-communicable diseases |
| 606 | Female infertility                                | 4 | Non-communicable diseases |
| 607 | Endometriosis                                     | 4 | Non-communicable diseases |
| 608 | Genital prolapse                                  | 4 | Non-communicable diseases |
| 609 | Premenstrual syndrome                             | 4 | Non-communicable diseases |
| 612 | Other gynecological diseases                      | 4 | Non-communicable diseases |
| 614 | Thalassemias                                      | 4 | Non-communicable diseases |
| 837 | Thalassemias trait                                | 4 | Non-communicable diseases |
| 615 | Sickle cell disorders                             | 4 | Non-communicable diseases |
| 838 | Sickle cell trait                                 | 4 | Non-communicable diseases |
| 616 | G6PD deficiency                                   | 4 | Non-communicable diseases |
| 839 | G6PD trait                                        | 4 | Non-communicable diseases |
| 618 | Other hemoglobinopathies and hemolytic anemias    | 4 | Non-communicable diseases |
| 619 | Endocrine, metabolic, blood, and immune disorders | 3 | Non-communicable diseases |
| 681 | Caries of deciduous teeth                         | 4 | Non-communicable diseases |
| 682 | Caries of permanent teeth                         | 4 | Non-communicable diseases |
| 683 | Periodontal diseases                              | 4 | Non-communicable diseases |
| 684 | Edentulism and severe tooth loss                  | 4 | Non-communicable diseases |
| 685 | Other oral disorders                              | 4 | Non-communicable diseases |
| 686 | Sudden infant death syndrome                      | 3 | Non-communicable diseases |
| 559 | Schizophrenia                                     | 3 | Mental disorder           |
| 568 | Major depressive disorder                         | 4 | Mental disorder           |
| 569 | Dysthymia                                         | 4 | Mental disorder           |
| 570 | Bipolar disorder                                  | 3 | Mental disorder           |
| 571 | Anxiety disorders                                 | 3 | Mental disorder           |
| 573 | Anorexia nervosa                                  | 4 | Mental disorder           |
| 574 | Bulimia nervosa                                   | 4 | Mental disorder           |
| 575 | Autism spectrum disorders                         | 3 | Mental disorder           |
| 578 | Attention-deficit/hyperactivity disorder          | 3 | Mental disorder           |

|     |                                                  |   |                       |
|-----|--------------------------------------------------|---|-----------------------|
| 579 | Conduct disorder                                 | 3 | Mental disorder       |
| 582 | Idiopathic developmental intellectual disability | 3 | Mental disorder       |
| 585 | Other mental disorders                           | 3 | Mental disorder       |
| 721 | Self-harm by firearm                             | 4 | Mental disorder       |
| 723 | Self-harm by other specified means               | 4 | Mental disorder       |
| 560 | Alcohol use disorders                            | 3 | Alcohol & other drugs |
| 562 | Opioid use disorders                             | 4 | Alcohol & other drugs |
| 563 | Cocaine use disorders                            | 4 | Alcohol & other drugs |
| 564 | Amphetamine use disorders                        | 4 | Alcohol & other drugs |
| 565 | Cannabis use disorders                           | 4 | Alcohol & other drugs |
| 566 | Other drug use disorders                         | 4 | Alcohol & other drugs |
| 690 | Pedestrian road injuries                         | 4 | Unintentional Injury  |
| 691 | Cyclist road injuries                            | 4 | Unintentional Injury  |
| 692 | Motorcyclist road injuries                       | 4 | Unintentional Injury  |
| 693 | Motor vehicle road injuries                      | 4 | Unintentional Injury  |
| 694 | Other road injuries                              | 4 | Unintentional Injury  |
| 695 | Other transport injuries                         | 3 | Unintentional Injury  |
| 697 | Falls                                            | 3 | Unintentional Injury  |
| 698 | Drowning                                         | 3 | Unintentional Injury  |
| 699 | Fire, heat, and hot substances                   | 3 | Unintentional Injury  |
| 701 | Poisoning by carbon monoxide                     | 4 | Unintentional Injury  |
| 703 | Poisoning by other means                         | 4 | Unintentional Injury  |
| 705 | Unintentional firearm injuries                   | 4 | Unintentional Injury  |
| 707 | Other exposure to mechanical forces              | 4 | Unintentional Injury  |
| 708 | Adverse effects of medical treatment             | 3 | Unintentional Injury  |
| 710 | Venomous animal contact                          | 4 | Unintentional Injury  |
| 711 | Non-venomous animal contact                      | 4 | Unintentional Injury  |
| 713 | Pulmonary aspiration and foreign body in airway  | 4 | Unintentional Injury  |
| 714 | Foreign body in eyes                             | 4 | Unintentional Injury  |
| 715 | Foreign body in other body part                  | 4 | Unintentional Injury  |
| 842 | Environmental heat and cold exposure             | 3 | Unintentional Injury  |
| 729 | Exposure to forces of nature                     | 3 | Unintentional Injury  |

|     |                                   |   |                      |
|-----|-----------------------------------|---|----------------------|
| 716 | Other unintentional injuries      | 3 | Unintentional Injury |
| 725 | Physical violence by firearm      | 4 | Assault              |
| 726 | Physical violence by sharp object | 4 | Assault              |
| 941 | Sexual violence                   | 4 | Assault              |
| 727 | Physical violence by other means  | 4 | Assault              |
| 945 | Conflict and terrorism            | 3 | Assault              |
| 854 | Executions and police conflict    | 3 | Assault              |

Figure A1. All-cause mortality rate (/100,000 pa) by sex, 10-24 years, 1990-2017

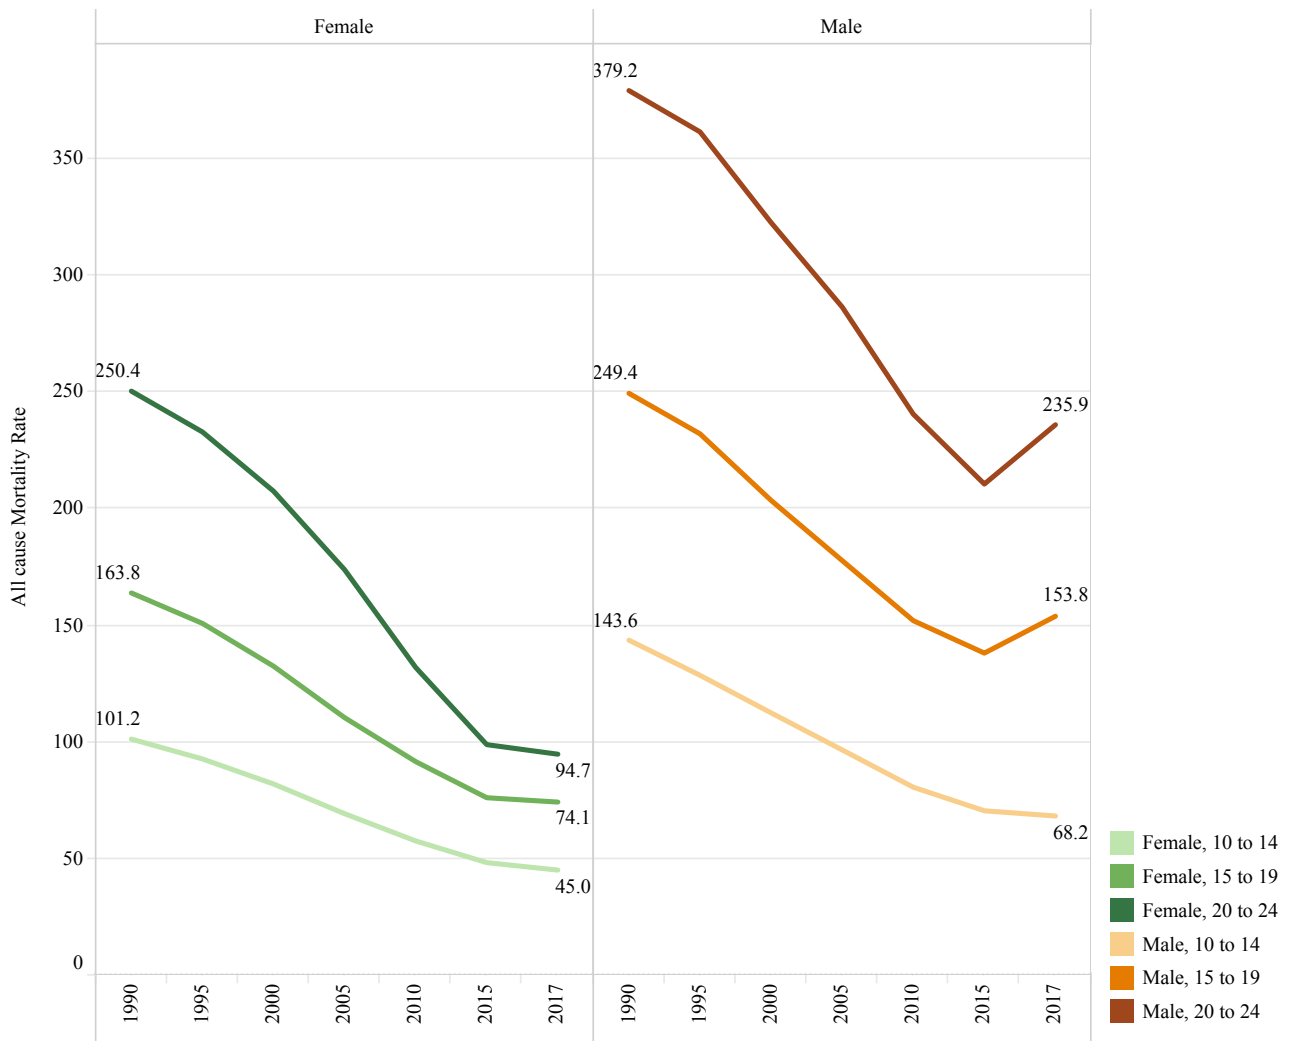

Table A3. Top ten causes of Mortality in 10-24-year-olds, 1990 and 2017. Rate (per 100,000) and annualised rate of change (%), GBD 2017.

|                             |                                             | Female                          |                                           |                   |                                          |                |                                 |                     | Male                                |                     |                    |  |  |
|-----------------------------|---------------------------------------------|---------------------------------|-------------------------------------------|-------------------|------------------------------------------|----------------|---------------------------------|---------------------|-------------------------------------|---------------------|--------------------|--|--|
|                             |                                             | 1990                            |                                           | 2017              |                                          |                |                                 |                     | 1990                                |                     | 2017               |  |  |
| Age Rank                    | Cause                                       | Rate                            | Cause                                     | Rate              | Rate of change (%)                       | Age Rank       | Cause                           | Rate                | Cause                               | Rate                | Rate of change (%) |  |  |
| 10 to 14                    | All Cause                                   | 101.2 (90.9-110.5)              | All Cause                                 | 45 (40.6-49.7)    | -2.1%                                    | 10 to 14       | All Cause                       | 143.6 (126.3-167.6) | All Cause                           | 68.2 (58.1-80.3)    | -2.0%              |  |  |
|                             | 1 Typhoid fever                             | 16.9 (8.8-29.2)                 | Typhoid fever                             | 5.7 (3.0-9.6)     | -2.5%                                    |                | 1 Typhoid fever                 | 16.3 (8.2-28.9)     | Drowning                            | 7.0 (4.6-10.0)      | -2.1%              |  |  |
|                             | 2 Measles                                   | 9.2 (3.2-20.7)                  | Drowning                                  | 3.0 (1.4-4.4)     | -2.1%                                    |                | 2 Drowning                      | 15.3 (10.1-21.8)    | Typhoid fever                       | 5.7 (2.9-10.4)      | -2.3%              |  |  |
|                             | 3 Drowning                                  | 6.6 (2.9-10.0)                  | Congenital heart anomalies                | 2.2 (1.4-3.1)     | -1.9%                                    |                | 3 Pedestrian road injuries      | 11.4 (6.6-18.0)     | Pedestrian road injuries            | 4.6 (2.5-7.4)       | -2.4%              |  |  |
|                             | 4 Lower respiratory infections              | 5.5 (3.1-8.5)                   | Lower respiratory infections              | 2.1 (1.3-3.2)     | -2.4%                                    |                | 4 Lower respiratory infections  | 9.4 (5.2-14.6)      | Lower respiratory infections        | 4.2 (2.4-6.3)       | -2.1%              |  |  |
|                             | 5 Drug-susceptible tuberculosis             | 5.4 (3.0-8.2)                   | Pedestrian road injuries                  | 2.0 (1.1-3.2)     | -2.3%                                    |                | 5 Drug-susceptible tuberculosis | 7.7 (4.5-12.0)      | Collective violence                 | 3.2 (3.2-3.2)       | 531.0%             |  |  |
|                             | 6 Pedestrian road injuries                  | 4.8 (2.6-7.8)                   | Collective violence                       | 1.8 (1.8-1.8)     | 401.7%                                   |                | 6 Rabies                        | 7.6 (1.4-22.5)      | Malaria                             | 2.8 (0.3-8.9)       | -1.4%              |  |  |
|                             | 7 Other unspecified infectious diseases     | 3.8 (1.8-7.1)                   | Malaria                                   | 1.5 (0.2-5.7)     | -1.3%                                    |                | 7 Measles                       | 6.6 (2.3-14.8)      | Congenital heart anomalies          | 2.3 (1.4-3.5)       | -1.6%              |  |  |
|                             | 8 Congenital heart anomalies                | 3.6 (2.0-5.8)                   | Other unspecified infectious diseases     | 1.3 (0.7-2.2)     | -2.5%                                    |                | 8 Malaria                       | 5.0 (0.3-20.0)      | Falls                               | 2.2 (1.2-3.5)       | -1.2%              |  |  |
|                             | 9 Malaria                                   | 2.5 (0.2-11.6)                  | Other leukemia                            | 1.3 (0.6-2.4)     | -1.9%                                    |                | 9 Asthma                        | 4.8 (2.8-7.5)       | Chronic liver disease, other causes | 1.8 (1.1-3.0)       | -0.8%              |  |  |
| 10 Other leukemia           | 2.4 (1.0-5.2)                               | Brain and nervous system cancer | 1.2 (0.6-1.9)                             | -0.9%             | 10 Motor vehicle road injuries           | 3.8 (1.2-7.3)  | Motor vehicle road injuries     | 1.8 (0.7-3.2)       | -2.1%                               |                     |                    |  |  |
| 15 to 19                    | All Cause                                   | 163.8 (142.8-181.0)             | All Cause                                 | 74.1 (63.3-83.3)  | -2.2%                                    | 15 to 19       | All Cause                       | 249.4 (212.9-309)   | All Cause                           | 153.8 (130.8-190.6) | -1.6%              |  |  |
|                             | 1 Drug-susceptible tuberculosis             | 21.2 (12.9-30.6)                | Pedestrian road injuries                  | 4.6 (2.1-8.7)     | -2.4%                                    |                | 1 Motor vehicle road injuries   | 27.6 (12.5-45.9)    | Collective violence                 | 25.9 (25.9-25.9)    | 1,302.4%           |  |  |
|                             | 2 Typhoid fever                             | 13.0 (5.9-24.6)                 | Collective violence                       | 4.5 (4.5-4.5)     | 739.7%                                   |                | 2 Pedestrian road injuries      | 22.7 (10.1-43.2)    | Motorcyclist road injuries          | 13.0 (6.9-21.0)     | -0.2%              |  |  |
|                             | 3 Pedestrian road injuries                  | 12.2 (5.8-21.6)                 | Typhoid fever                             | 4.5 (2.1-8.5)     | -2.5%                                    |                | 3 Malaria                       | 18.3 (5.2-44.3)     | Motor vehicle road injuries         | 12.2 (6.6-20.5)     | -2.2%              |  |  |
|                             | 4 Malaria                                   | 9.2 (2.2-25.6)                  | Malaria                                   | 3.7 (1.2-7.7)     | -2.2%                                    |                | 4 Drug-susceptible tuberculosis | 15.5 (9.1-24.9)     | Malaria                             | 9.8 (3.5-19.8)      | -1.7%              |  |  |
|                             | 5 Maternal hemorrhage                       | 8.7 (4.4-13.8)                  | Motor vehicle road injuries               | 3.6 (1.6-6.3)     | -2.0%                                    |                | 5 Drowning                      | 15.5 (9.6-23.5)     | Pedestrian road injuries            | 8.1 (3.0-16.0)      | -2.5%              |  |  |
|                             | 6 Motor vehicle road injuries               | 7.3 (2.8-14.3)                  | Drug-susceptible tuberculosis             | 2.6 (1.8-3.7)     | -3.3%                                    |                | 6 Motorcyclist road injuries    | 13.7 (5.6-26.7)     | Drowning                            | 7.9 (5.0-12.4)      | -1.9%              |  |  |
|                             | 7 Lower respiratory infections              | 5.7 (3.5-8.9)                   | HIV/AIDS resulting in other diseases      | 2.2 (0.9-4.4)     | 891.3%                                   |                | 7 Typhoid fever                 | 11.0 (5.0-21.1)     | Self-harm by other means            | 5.2 (3.3-8.1)       | -1.3%              |  |  |
|                             | 8 Measles                                   | 4.9 (1.6-11.7)                  | Motorcyclist road injuries                | 2.2 (0.8-4.3)     | -1.6%                                    |                | 8 Self-harm by other means      | 8.0 (4.3-13.8)      | Typhoid fever                       | 4.2 (1.9-8.2)       | -2.3%              |  |  |
|                             | 9 Motorcyclist road injuries                | 3.8 (0.9-8.2)                   | Lower respiratory infections              | 2.2 (1.4-3.3)     | -2.4%                                    |                | 9 Lower respiratory infections  | 7.9 (4.2-12.5)      | Falls                               | 4.1 (2.6-6.3)       | -0.9%              |  |  |
| 10 Drowning                 | 3.7 (2.1-5.8)                               | Maternal hemorrhage             | 2.1 (0.7-4.0)                             | -2.8%             | 10 Other unspecified infectious diseases | 7.1 (2.8-13.4) | Lower respiratory infections    | 4.0 (2.3-6.4)       | -1.9%                               |                     |                    |  |  |
| 20 to 24                    | All Cause                                   | 250.4 (212.3-277.6)             | All Cause                                 | 94.7 (80.2-108.2) | -2.5%                                    | 20 to 24       | All Cause                       | 379.2 (322.4-468.6) | All Cause                           | 235.9 (195.7-291.5) | -1.7%              |  |  |
|                             | 1 Drug-susceptible tuberculosis             | 46.7 (28.9-65.1)                | Maternal hemorrhage                       | 7.1 (3.0-12.6)    | -2.6%                                    |                | 1 Drug-susceptible tuberculosis | 46.4 (28.2-68.7)    | Collective violence                 | 42.8 (42.8-42.9)    | 840.8%             |  |  |
|                             | 2 Maternal hemorrhage                       | 24.5 (14.6-36.5)                | Collective violence                       | 5.3 (5.3-5.3)     | 783.0%                                   |                | 2 Motor vehicle road injuries   | 42.8 (20.2-68.1)    | Motor vehicle road injuries         | 19.7 (11.6-30.7)    | -2.1%              |  |  |
|                             | 3 Pedestrian road injuries                  | 15.1 (7.1-27.4)                 | Drug-susceptible tuberculosis             | 4.7 (3.0-6.8)     | -3.4%                                    |                | 3 Pedestrian road injuries      | 27.4 (12.3-54.2)    | Motorcyclist road injuries          | 19.1 (11.7-30.0)    | -0.2%              |  |  |
|                             | 4 Typhoid fever                             | 9.5 (4.5-18.5)                  | Pedestrian road injuries                  | 4.1 (1.8-7.7)     | -2.8%                                    |                | 4 Motorcyclist road injuries    | 20.4 (9.8-38.9)     | Self-harm by other means            | 10.7 (6.5-16.1)     | -1.2%              |  |  |
|                             | 5 Motor vehicle road injuries               | 9.2 (3.0-17.7)                  | Motor vehicle road injuries               | 3.7 (1.7-6.3)     | -2.4%                                    |                | 5 Malaria                       | 16.4 (5.3-43.1)     | Pedestrian road injuries            | 10.7 (4.1-21.4)     | -2.4%              |  |  |
|                             | 6 Malaria                                   | 8.2 (2.3-20.1)                  | Typhoid fever                             | 3.4 (1.5-6.4)     | -2.5%                                    |                | 6 Self-harm by other means      | 15.6 (8.6-27.0)     | Malaria                             | 9.7 (3.9-21.2)      | -1.4%              |  |  |
|                             | 7 Lower respiratory infections              | 7.6 (4.6-12.3)                  | HIV/AIDS resulting in other diseases      | 3.0 (1.4-7.0)     | 267.8%                                   |                | 7 Drowning                      | 14.6 (8.8-22.9)     | Drowning                            | 7.6 (4.7-11.7)      | -1.8%              |  |  |
|                             | 8 Chronic kidney disease, unspecified cause | 6.7 (3.8-10.6)                  | Malaria                                   | 2.8 (1.1-5.8)     | -2.5%                                    |                | 8 Lower respiratory infections  | 13.4 (7.6-22.8)     | Lower respiratory infections        | 7.0 (3.9-11.3)      | -1.8%              |  |  |
|                             | 9 Asthma                                    | 6.6 (2.7-10.6)                  | Chronic kidney disease, unspecified cause | 2.4 (1.4-3.8)     | -2.4%                                    |                | 9 Asthma                        | 11.2 (6.0-17.8)     | Drug-susceptible tuberculosis       | 7.0 (4.4-10.7)      | -3.2%              |  |  |
| 10 Self-harm by other means | 5.1 (3.1-8.5)                               | Lower respiratory infections    | 2.2 (1.4-3.5)                             | -2.8%             | 10 Chronic liver disease due to hep B    | 8.7 (4.6-14.0) | Falls                           | 6.5 (4.1-10.1)      | -0.8%                               |                     |                    |  |  |

| Legend                       |
|------------------------------|
| HIV                          |
| Sexual & Reproductive Health |
| Communicable Diseases        |
| Nutrition                    |
| Assault                      |
| Unintentional Injury         |
| Alcohol & other Drugs        |
| Mental Disorder              |
| Non-communicable Diseases    |

Table A4. Top ten causes of Years Lost to Disability in 10-24-year-olds, 1990 and 2017. Rate (per 100,000) and annualised rate of change (%), GBD 2017.

|                                          |                                      | Female                       |                                 |                            |                              |                                   |                            |                                 | Male                      |           |      |  |                    |
|------------------------------------------|--------------------------------------|------------------------------|---------------------------------|----------------------------|------------------------------|-----------------------------------|----------------------------|---------------------------------|---------------------------|-----------|------|--|--------------------|
|                                          |                                      | 1990                         |                                 | 2017                       |                              | Rate of change (%)                |                            |                                 | 1990                      |           | 2017 |  | Rate of change (%) |
| Age Rank                                 | Cause                                | Rate                         | Cause                           | Rate                       | Age Rank                     |                                   | Cause                      | Rate                            | Cause                     | Rate      |      |  |                    |
| 10 to 14                                 | All cause                            | 6,783.7 (4,642.5-9,754.7)    | All cause                       | 5,203.6 (3,680.5-7,248.0)  | -0.9%                        | All cause                         | 6,386.3 (4,388-8,767.9)    | All cause                       | 5,233.1 (3,698.5-7,475.9) | -0.7%     |      |  |                    |
|                                          | 1 Dietary iron deficiency            | 941.6 (338.2-1,973.2)        | Dietary iron deficiency         | 410.9 (108.8-1,111.3)      | -2.3%                        | 1 Conduct disorder                | 547.6 (317.9-895.6)        | Conduct disorder                | 553.2 (320.0-924.5)       | 0.0%      |      |  |                    |
|                                          | 2 Vitamin A deficiency               | 450.2 (154.5-976.5)          | Migraine                        | 410.3 (248.2-627.4)        | 0.1%                         | 2 Dietary iron deficiency         | 374.9 (71.3-941.9)         | Migraine                        | 373.6 (219.0-575.3)       | 0.1%      |      |  |                    |
|                                          | 3 Migraine                           | 406.6 (243.4-623.5)          | Conduct disorder                | 370.7 (198.7-640.0)        | 0.0%                         | 3 Migraine                        | 369.3 (219.6-562.5)        | Dietary iron deficiency         | 309.7 (17.6-1,389.1)      | -0.6%     |      |  |                    |
|                                          | 4 Conduct disorder                   | 367.9 (203.0-629.6)          | Anxiety disorders               | 349.0 (232.8-491.0)        | 0.0%                         | 4 Vitamin A deficiency            | 350.5 (63.7-910.5)         | Anxiety disorders               | 229.8 (148.4-337.8)       | 0.0%      |      |  |                    |
|                                          | 5 Anxiety disorders                  | 344.8 (225.6-487.7)          | Atopic dermatitis               | 228.6 (118.5-402.4)        | 0.0%                         | 5 Lymphatic filariasis            | 334.6 (137.2-668.7)        | Other congenital birth defects  | 229.7 (144.3-334.3)       | -0.5%     |      |  |                    |
|                                          | 6 Atopic dermatitis                  | 226.5 (114.2-393.3)          | Low back pain                   | 200.7 (119.3-308.7)        | 0.1%                         | 6 Other congenital birth defects  | 265.3 (164.0-386.2)        | Age-related/ other hearing loss | 206.9 (132.2-300.2)       | -0.1%     |      |  |                    |
|                                          | 7 Ascariasis                         | 203.4 (112.0-343.8)          | Scabies                         | 158.0 (78.3-278.7)         | -0.2%                        | 7 Anxiety disorders               | 227.1 (143.8-335.4)        | Low back pain                   | 181.6 (104.1-278.1)       | 0.1%      |      |  |                    |
|                                          | 8 Low back pain                      | 198.3 (118.2-297.9)          | Vitamin A deficiency            | 156.1 (41.6-407.1)         | -2.5%                        | 8 Age-related/ other hearing loss | 214.2 (135.9-310.3)        | Atopic dermatitis               | 181.4 (90.0-322.0)        | 0.0%      |      |  |                    |
|                                          | 9 Trichuriasis                       | 183.1 (93.5-325.5)           | Age-related/ other hearing loss | 155.3 (100.9-231.7)        | -0.0%                        | 9 Ascariasis                      | 201.0 (110.4-336.4)        | Asthma                          | 174.4 (101.7-270.7)       | -0.4%     |      |  |                    |
| 10 Refraction disorders                  | 182.8 (112.1-284.4)                  | Asthma                       | 150.5 (89.3-231.3)              | -0.1%                      | 10 Asthma                    | 191.2 (112.0-295.2)               | Scabies                    | 164.1 (80.5-292.1)              | -0.2%                     |           |      |  |                    |
| 15 to 19                                 | All cause                            | 7,563.2 (5,527.9-9,996.2)    | All cause                       | 6,757.5 (4,980.2-9,122.0)  | -0.4%                        | All cause                         | 7,287.1 (5,248-9,873.4)    | All cause                       | 6,421.4 (4,727.3-8,384.6) | -0.4%     |      |  |                    |
|                                          | 1 Dietary iron deficiency            | 803.2 (373.6-1,392.0)        | Migraine                        | 673.8 (407.2-1,037.7)      | 0.0%                         | 1 Migraine                        | 603.2 (358.5-938.0)        | Migraine                        | 607.6 (352.6-934.7)       | 0.0%      |      |  |                    |
|                                          | 2 Migraine                           | 665.9 (402.7-1,020.2)        | Dietary iron deficiency         | 510.2 (148.0-1,199.7)      | -1.7%                        | 2 Conduct disorder                | 434.0 (240.9-731.9)        | Conduct disorder                | 436.3 (245.1-729.4)       | 0.0%      |      |  |                    |
|                                          | 3 Anxiety disorders                  | 417.7 (281.2-580.9)          | Anxiety disorders               | 418.4 (276.4-579.5)        | 0.0%                         | 3 Dietary iron deficiency         | 410.4 (49.3-1,339.4)       | Low back pain                   | 317.3 (186.1-490.2)       | 0.1%      |      |  |                    |
|                                          | 4 Low back pain                      | 301.3 (180.2-460.4)          | Low back pain                   | 303.1 (181.7-471.7)        | 0.0%                         | 4 Lymphatic filariasis            | 395.7 (170.6-785.9)        | Anxiety disorders               | 262.3 (172.9-369.6)       | 0.0%      |      |  |                    |
|                                          | 5 Conduct disorder                   | 236.1 (129.5-396.3)          | Conduct disorder                | 237.7 (126.6-399.8)        | 0.0%                         | 5 Low back pain                   | 311.2 (185.1-481.2)        | Age-related/ other hearing loss | 252.8 (167.8-365.1)       | -0.1%     |      |  |                    |
|                                          | 6 Scabies                            | 205.2 (104.3-348.2)          | Age-related/ other hearing loss | 194.6 (128.8-285.3)        | -0.0%                        | 6 Other congenital birth defects  | 264.3 (163.0-400.0)        | Exposure to forces of nature    | 229.4 (140.5-353.4)       | 30,029.7% |      |  |                    |
|                                          | 7 Other musculoskeletal              | 201.9 (105.2-322.9)          | Major depressive disorder       | 193.9 (110.6-310.4)        | -0.1%                        | 7 Age-related/ other hearing loss | 260.9 (172.6-373.9)        | Other congenital birth defects  | 226.7 (143.0-336.5)       | -0.6%     |      |  |                    |
|                                          | 8 Age-related/ other hearing loss    | 196.2 (128.7-280.8)          | Scabies                         | 192.9 (97.5-333.8)         | -0.2%                        | 8 Anxiety disorders               | 259.0 (168.1-369.1)        | Scabies                         | 190.5 (98.0-326.1)        | -0.2%     |      |  |                    |
|                                          | 9 Major depressive disorder          | 194.6 (112.8-307.7)          | Other musculoskeletal           | 177.9 (97.3-295.5)         | -0.5%                        | 9 Scabies                         | 201.9 (101.7-352.5)        | Major depressive disorder       | 189.0 (107.2-300.6)       | 0.1%      |      |  |                    |
| 10 Refraction disorders                  | 177.7 (111.8-269.1)                  | Exposure to forces of nature | 162.1 (99.8-256.9)              | 30,226.7%                  | 10 Major depressive disorder | 184.3 (105.6-288.1)               | Bipolar disorder           | 150.0 (82.8-248.1)              | 0.0%                      |           |      |  |                    |
| 20 to 24                                 | All cause                            | 9,449.4 (6,852.6-12,581.3)   | All cause                       | 8,067.7 (5,821.3-10,824.5) | -0.6%                        | All cause                         | 8,295.3 (6,044.8-11,007.4) | All cause                       | 7,406.5 (5,491-9,649)     | -0.4%     |      |  |                    |
|                                          | 1 Dietary iron deficiency            | 1,408.5 (702.9-2,423.9)      | Migraine                        | 823.3 (503.8-1,264.9)      | 0.1%                         | 1 Migraine                        | 721.3 (433.7-1,104.8)      | Migraine                        | 730.4 (441.7-1,121.2)     | 0.0%      |      |  |                    |
|                                          | 2 Migraine                           | 814.2 (482.3-1,267.4)        | Dietary iron deficiency         | 714.0 (239.1-1,514.4)      | -2.1%                        | 2 Lymphatic filariasis            | 483.1 (201.5-946.0)        | Low back pain                   | 419.8 (248.4-652.3)       | 0.1%      |      |  |                    |
|                                          | 3 Other musculoskeletal              | 407.7 (251.3-604.1)          | Anxiety disorders               | 409.7 (272.8-573.7)        | 0.0%                         | 3 Low back pain                   | 412.1 (250.8-629.6)        | Exposure to forces of nature    | 362.7 (226.4-543.3)       | 28,541.2% |      |  |                    |
|                                          | 4 Anxiety disorders                  | 407.0 (276.0-563.4)          | Low back pain                   | 381.0 (232.4-596.0)        | 0.1%                         | 4 Dietary iron deficiency         | 349.1 (58.2-991.8)         | Age-related/ other hearing loss | 300.1 (197.1-440.4)       | -0.1%     |      |  |                    |
|                                          | 5 Low back pain                      | 377.1 (230.6-583.9)          | Other musculoskeletal           | 359.4 (213.7-535.9)        | -0.4%                        | 5 Age-related/ other hearing loss | 308.5 (205.8-449.2)        | Anxiety disorders               | 243.0 (155.4-344.2)       | 0.0%      |      |  |                    |
|                                          | 6 Age-related and other hearing loss | 241.3 (158.0-350.1)          | Age-related/ other hearing loss | 241.9 (157.1-361.2)        | 0.0%                         | 6 Other congenital birth defects  | 263.0 (164.9-384.8)        | Other congenital birth defects  | 225.0 (137.5-332.5)       | -0.5%     |      |  |                    |
|                                          | 7 Diabetes mellitus type 2           | 225.2 (136.1-345.7)          | Exposure to forces of nature    | 204.9 (124.5-317.0)        | 29,166.9%                    | 7 Other musculoskeletal           | 248.2 (142.3-394.2)        | Other musculoskeletal           | 221.7 (118.6-355.1)       | -0.5%     |      |  |                    |
|                                          | 8 Premenstrual syndrome              | 215.1 (133.9-322.4)          | Premenstrual syndrome           | 202.4 (125.5-311.2)        | -0.2%                        | 8 Anxiety disorders               | 241.1 (162.3-342.1)        | Opioid use disorders            | 219.0 (123.3-334.6)       | 0.1%      |      |  |                    |
|                                          | 9 Scabies                            | 214.3 (107.8-376.2)          | Scabies                         | 201.3 (102.7-346.2)        | -0.2%                        | 9 Opioid use disorders            | 210.1 (122.5-326.6)        | Scabies                         | 191.7 (98.0-333.1)        | -0.3%     |      |  |                    |
| 10 Chronic obstructive pulmonary disease | 181.5 (124.3-247.5)                  | Diabetes mellitus type 2     | 173.2 (99.1-266.2)              | -0.8%                      | 10 Scabies                   | 206.9 (105.0-359.8)               | Other mental disorders     | 188.6 (119.6-278.2)             | 0.0%                      |           |      |  |                    |

| Legend                       |
|------------------------------|
| HIV                          |
| Sexual & Reproductive Health |
| Communicable Diseases        |
| Nutrition                    |
| Assault                      |
| Unintentional Injury         |
| Alcohol & other Drugs        |
| Mental Disorder              |
| Non-communicable Diseases    |

Figure A2. Causes of DALYs by sex, in 10-14-year-olds. GBD 2017

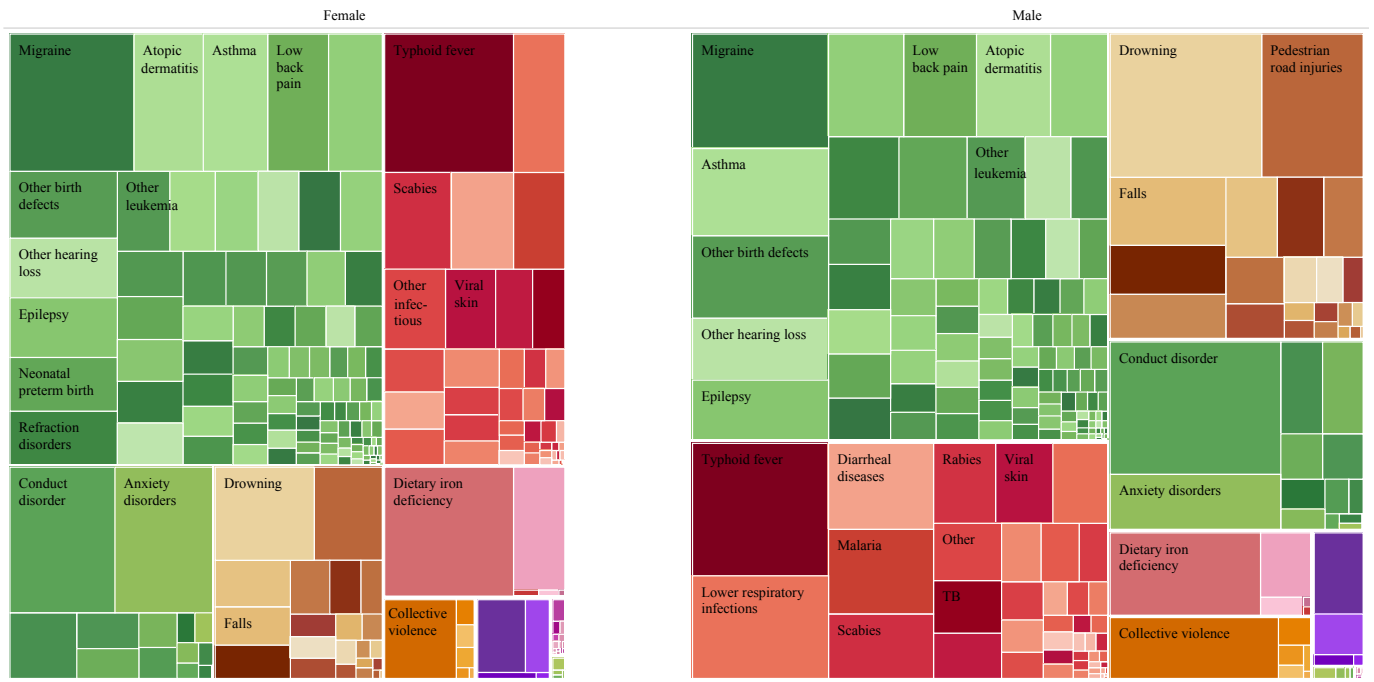



Figure A3. Causes of DALYs by sex, in 15-19-year-olds. GBD 2017

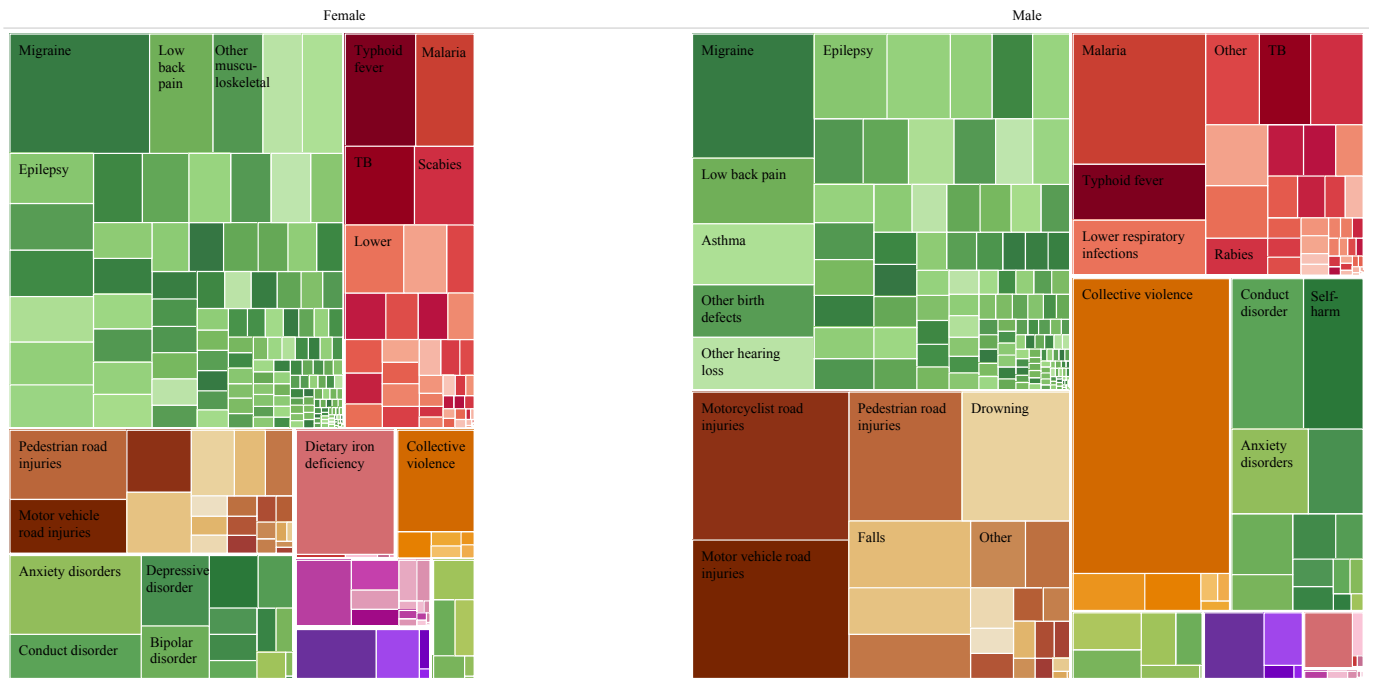

Figure A4. Causes of DALYs by sex, in 20-24-year-olds. GBD 2017

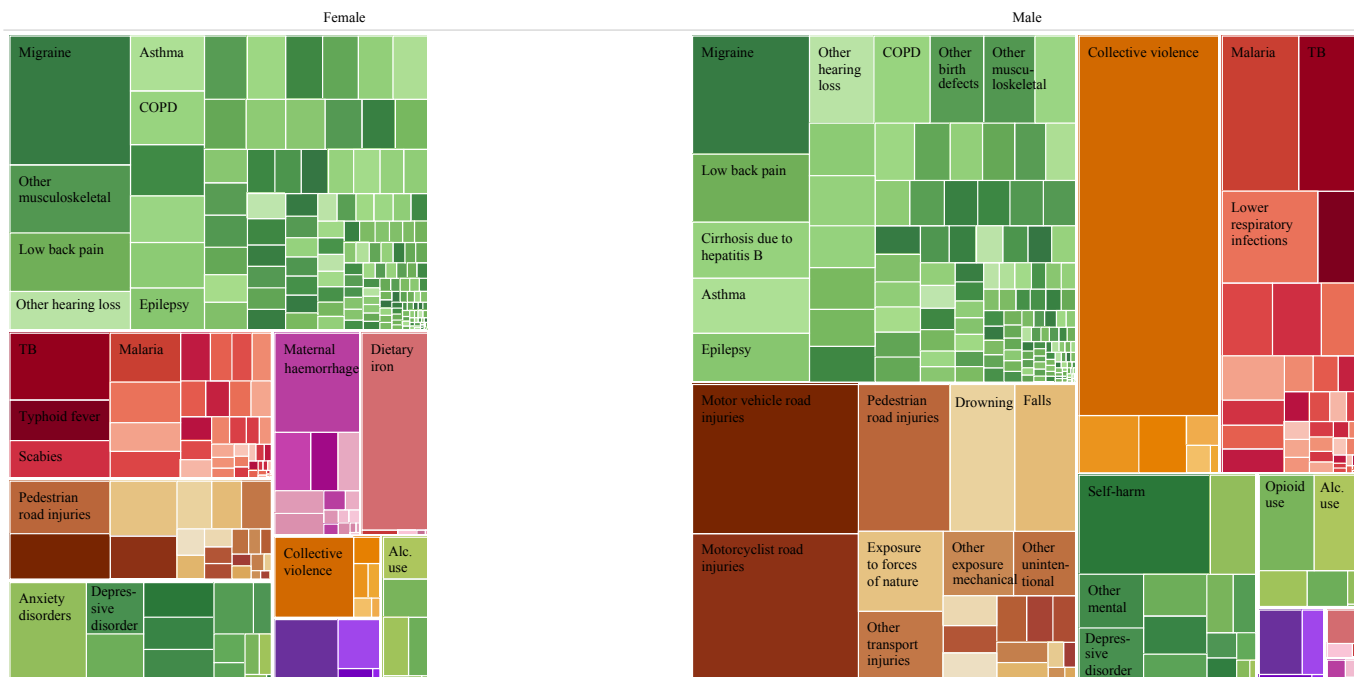

Table A5. Myanmar estimates and uncertainty intervals (where available) for all risks and social determinants, disaggregated by age and sex.

| Source                                   | Indicator                                                      | Age      | Female            | Male              |
|------------------------------------------|----------------------------------------------------------------|----------|-------------------|-------------------|
| <i>Health risks</i>                      |                                                                |          |                   |                   |
| GBD Study (2017)                         | Anaemia (total all cause) prevalence (%)                       | 10 to 14 | 21.4 (7.6-48.1)   | 14.1 (1.3-57.7)   |
|                                          |                                                                | 15 to 19 | 30.6 (12.2-55.6)  | 16.5 (1.5-54.3)   |
|                                          |                                                                | 20 to 24 | 37.9 (18.5-61.5)  | 10.6 (0.7-37.4)   |
| GBD Study (2016)                         | Binge drinking (>48g females, >60g males) past 12m, 10-24y (%) | 10 to 14 | 0.8 (0.3-1.4)     | 3.9 (2.0-6.6)     |
|                                          |                                                                | 15 to 19 | 1.1 (0.5-2.0)     | 9.1 (4.5-16.1)    |
|                                          |                                                                | 20 to 24 | 1.3 (0.6-2.5)     | 14.2 (6.5-25.0)   |
| GBD Study (2017)                         | Prevalence of tobacco smoking (%)                              | 10 to 14 | 0.1 (0.0-0.4)     | 0.3 (0.1-0.7)     |
|                                          |                                                                | 15 to 19 | 0.4 (0.0-1.3)     | 6.3 (2.9-11.8)    |
|                                          |                                                                | 20 to 24 | 1.1 (0.2-3.6)     | 23.3 (12.9-38.3)  |
| GBD Study (2017)                         | DALYs (rate per 100,000) due to illicit drug use               | 10 to 24 | 336.9 (228.4-482) | 659 (467.6-879.6) |
|                                          |                                                                | 15 to 19 | 199.1 (122-314.1) | 304 (200.6-451)   |
|                                          |                                                                | 20 to 24 | 3.6 (2-6.2)       | 6.3 (3.5-10.1)    |
| WHO Global Health Observatory (2019)     | Overweight and Obesity Prevalence BMI $\geq$ +1SD (%)          | 10 to 19 | 9.3 (5.2-14.3)    | 12.1 (6.2-19.9)   |
|                                          | Thinness Prevalence BMI $\leq$ +2SD (%)                        | 10 to 19 | 9.9 (4.7-17.2)    | 15.8 (7.3-26.8)   |
| <i>Determinants</i>                      |                                                                |          |                   |                   |
| Myanmar DHS (2016)                       | Live births per 1,000 females                                  | 10 to 14 | 1.0               | -                 |
|                                          |                                                                | 15 to 19 | 36.0              | -                 |
|                                          |                                                                | 20 to 24 | 112.0             | -                 |
| GBD Study (2017)                         | Live births per 1,000 females                                  | 10 to 14 | 0.3 (0.1-0.5)     | -                 |
|                                          |                                                                | 15 to 19 | 24.8 (20.9-29.8)  | -                 |
|                                          |                                                                | 20 to 24 | 84.7 (70.9-102.3) | -                 |
| UNESCO Institute for Statistics (2019)   | Literacy (%)                                                   | 15 to 24 | 84                | 85                |
| GBD Study (2017)                         | Mean years of education                                        | 10 to 14 | 7.3 (6.7-8.0)     | 7.3 (6.7-8.0)     |
|                                          |                                                                | 15 to 19 | 8.7 (8.1-9.2)     | 8.3 (7.7-8.9)     |
|                                          |                                                                | 20 to 24 | 9.8 (9.0-10.7)    | 9.3 (8.4-10.2)    |
| GBD Study (2016)                         | Demand for modern contraception satisfied females (%)          | 15 to 24 | 79.3 (74.4-83.7)  | -                 |
| International Labour Organization (2019) | Youth not in education, employment or training (%)             | 15 to 24 | 23.6              | 10.6              |

|                    |                                                        |          |      |      |
|--------------------|--------------------------------------------------------|----------|------|------|
| Myanmar DHS (2016) | Child Marriage - Adolescents married before age 15 (%) | 20 to 24 | 2    | 0    |
|                    | - Adolescents married before age 18 (%)                |          | 16   | 5    |
| Myanmar DHS (2016) | Educational Attainment (%) - none                      | 20 to 24 | 7.5  | 7.3  |
|                    | - some primary                                         |          | 15.6 | 14.6 |
|                    | - completed primary                                    |          | 15.9 | 12   |
|                    | - some secondary                                       |          | 41.9 | 49.3 |
|                    | - completed secondary                                  |          | 6.1  | 7.1  |
|                    | - higher                                               |          | 13   | 9.7  |

Figure A5. Full Legend for Figure 2.

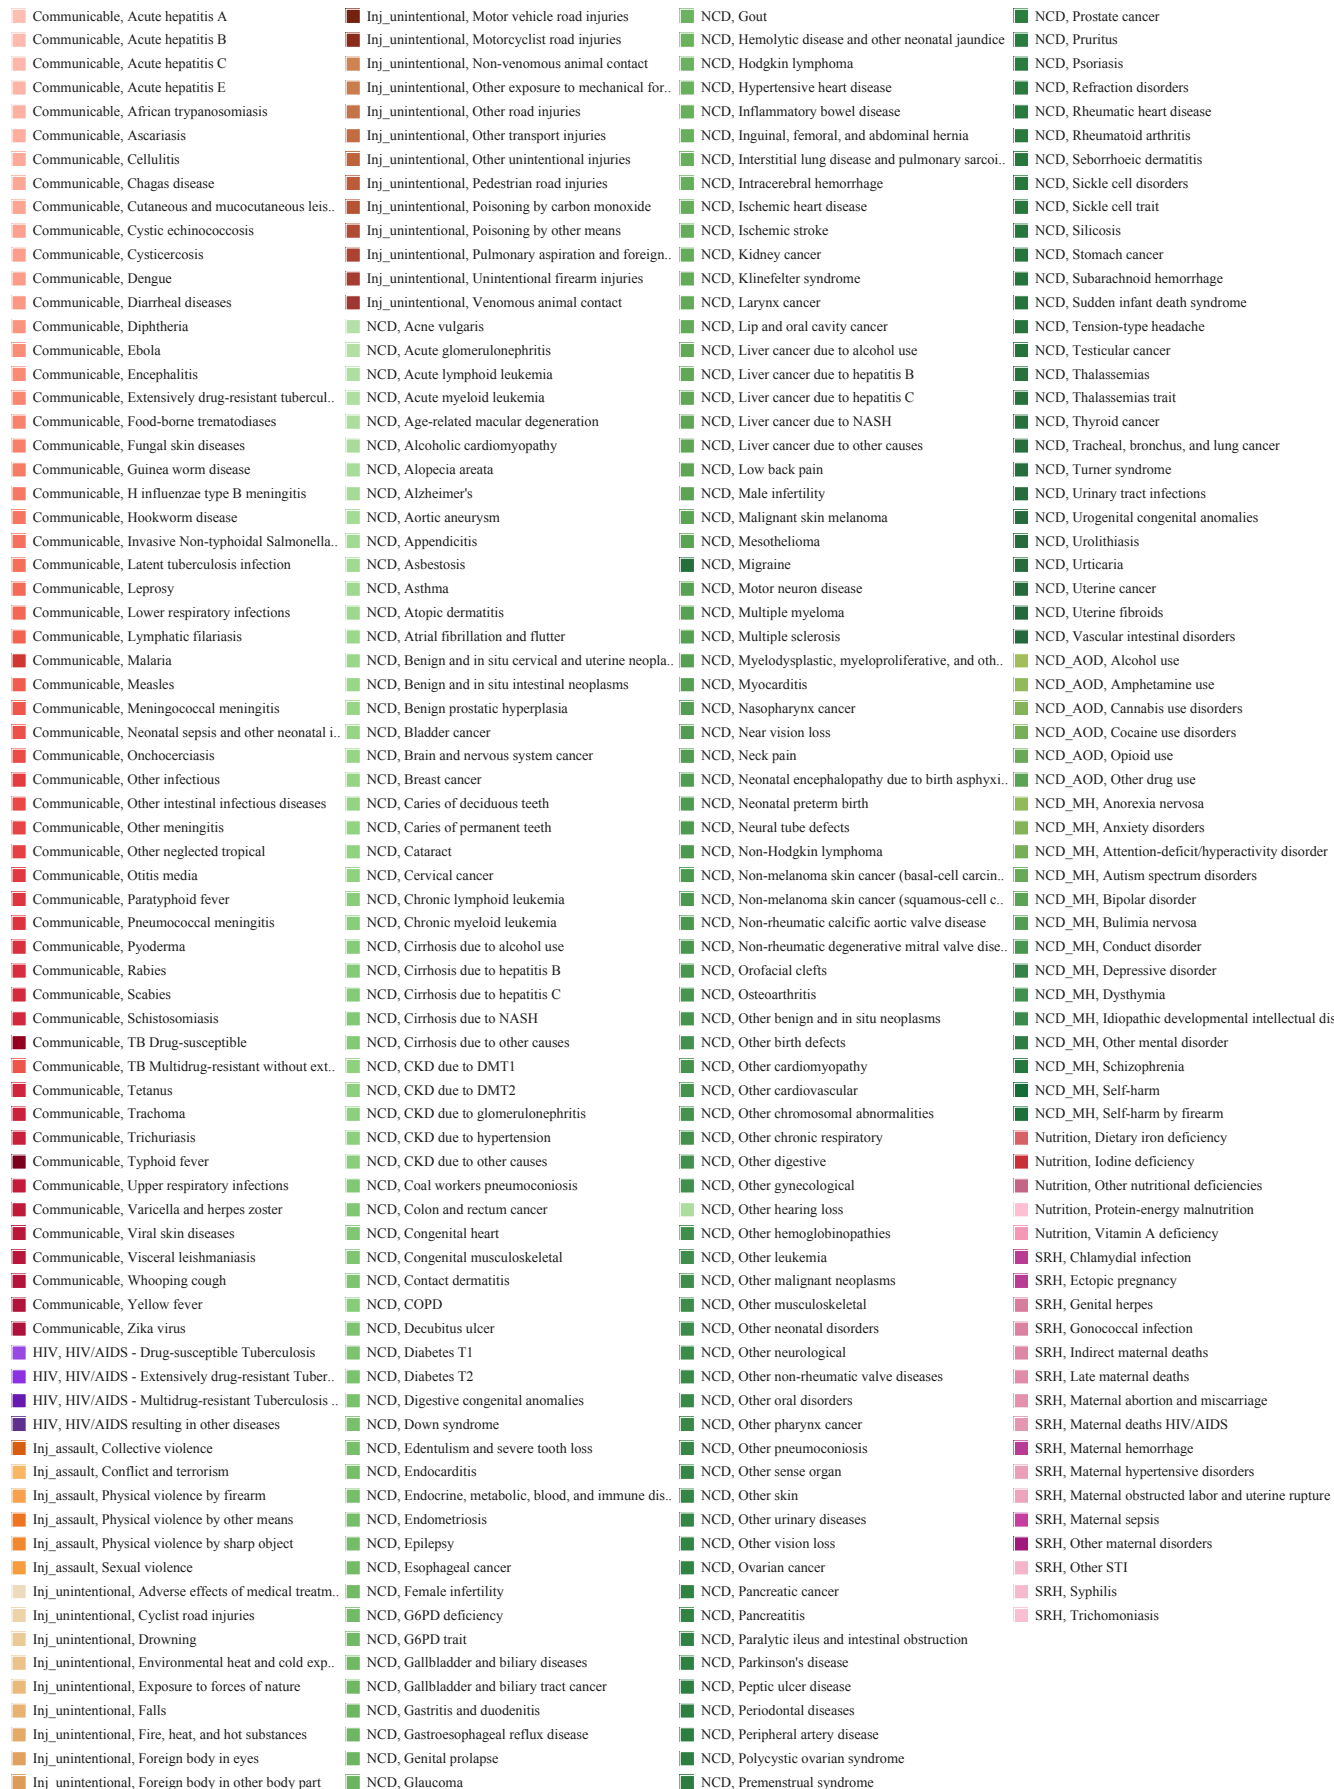

Supplement: ZGHA_A_1844976_SM8888.pdf [file ZGHA_A_1844976_SM8888.pdf]
